# Supplementary material for: Comprehensive Network Analysis Reveals Alternative Splicing-Related lncRNAs in Hepatocellular Carcinoma
Source: PubMed Central journal article supplement (PMC7373802; doi:10.3389/fgene.2020.00659), 2020-07-15

**Figure S1 (A)**

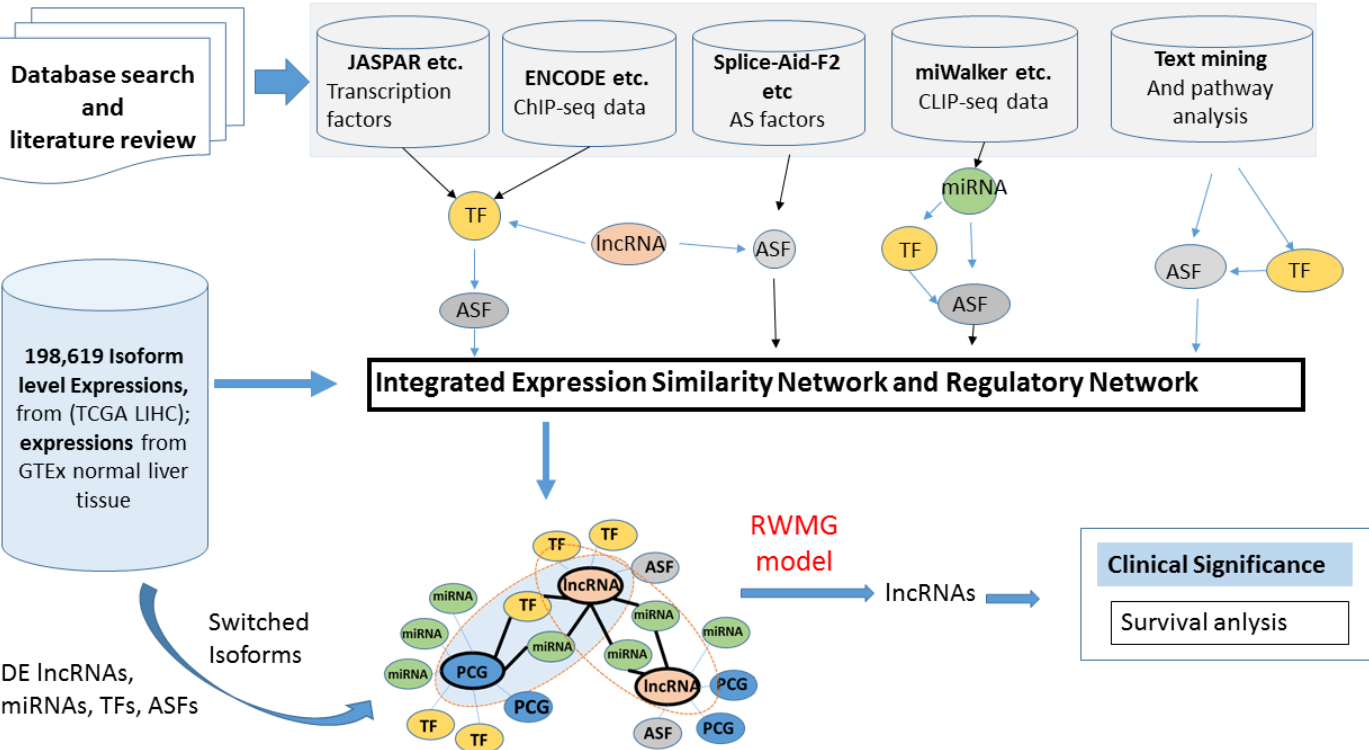

**(B)**

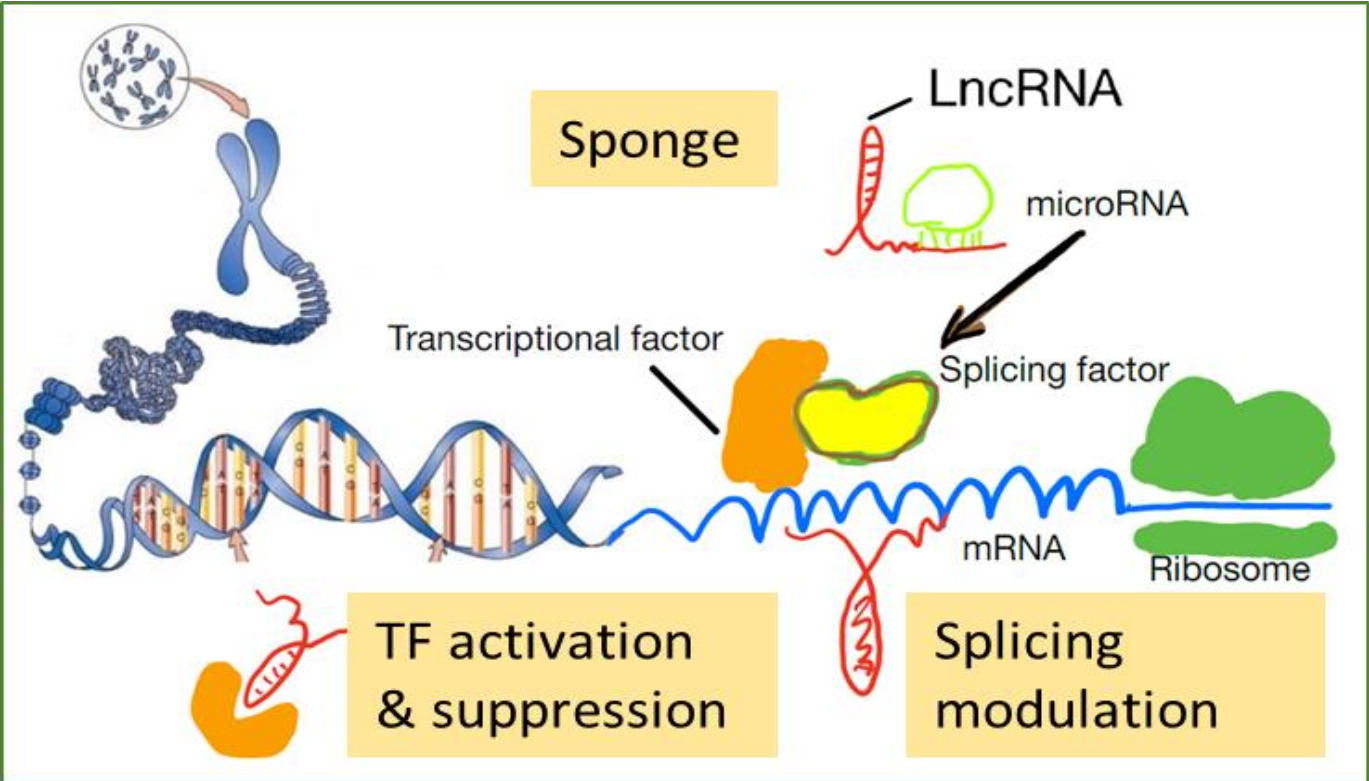

Supplement: Image_1.pdf [file Image_1.pdf]
