# Supplementary material for: Comprehensive Network Analysis Reveals Alternative Splicing-Related lncRNAs in Hepatocellular Carcinoma
Source: Front Genet. 2020 Jul 15;11:659. doi: 10.3389/fgene.2020.00659 (PMC7373802; doi:10.3389/fgene.2020.00659)
Supplement: TABLE S6 — Total number of node and edge distribution for the three networks. [file Table_6.xlsx]

## Sheet: Sheet1
network types	nodes	edges
epigenetic network	305	3162
Co-expression network	234	2533
PPI network	537	1730
